# Supplementary material for: METTL3 Modulates Osteoclast Differentiation and Function by Controlling RNA Stability and Nuclear Export
Source: PubMed Central journal article supplement (PMC7084668; doi:10.3390/ijms21051660), 2020-02-28
Supplement: ijms-21-01660-s001.pdf [file ijms-21-01660-s001.pdf]

Supplemental Materials:

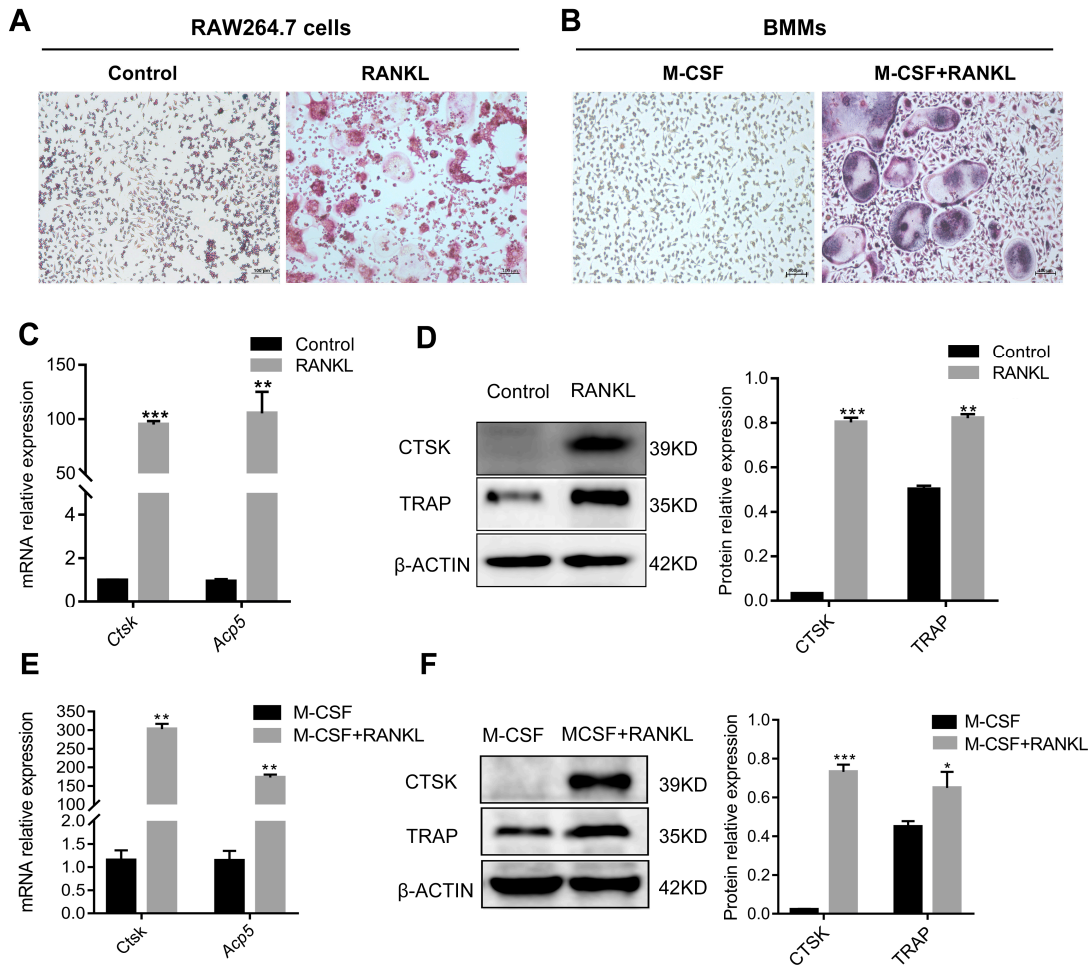

**Figure S1.** RANKL-induced osteoclastogenesis of RAW264.7 cells and M-CSF/RANKL-induced osteoclastogenesis of BMMs. RAW264.7 cells (A,C,D) were treated with 50 ng/mL RANKL for 5 days and cells without RANKL treatment were used as the control. BMMs (B,E,F) were treated with 30 ng/mL macrophage-colony stimulating factor (M-CSF) and 50 ng/mL RANKL or with 30 ng/mL M-CSF alone for 5 days. (A,B) Images of TRAP staining. TRAP-positive multinucleated cells containing at least 3 nuclei were identified as osteoclasts. Scale bars represent 100  $\mu$ m (original magnification 100 $\times$ ). (C,E) The mRNA levels of *Ctsk* and *Acp5* were assessed using qRT-PCR. (D,F) The protein levels of CTSK and TRAP were measured by Western blotting. The band densities were analyzed using ImageJ.  $\beta$ -Actin was used as an internal control. All of the data represent the mean  $\pm$  standard deviation (SD) of three independent experiments ( $n = 3$ ). \*  $P < 0.05$ ; \*\*  $P < 0.01$ ; \*\*\*  $P < 0.001$ .
